# Supplementary material for: Molecular structure – intrinsic photostability relationships for diketopyrrolopyrrole-based conjugated polymers
Source: Royal Society of Chemistry journal article supplement (doi:10.1039/d2ta09402a), 2023-01-01
Supplement: d2ta09402a1.pdf [file d2ta09402a1.pdf]

## Electronic Supplementary Information

### Molecular structure – intrinsic photostability relationships for diketopyrrolopyrrole-based conjugated polymers

Petr M. Kuznetsov,<sup>a</sup> Ilya V. Martynov,<sup>a</sup> Ivan S. Zhidkov,<sup>b,c</sup> Lavrenty G. Gutsev,<sup>a</sup> Ekaterina Khakina,<sup>d,e</sup> Elena N. Zakharchenko,<sup>d</sup> Nikita A. Slesarenko,<sup>a</sup> Andrey I. Kukharenko,<sup>b,c</sup> and Pavel A. Troshin<sup>a\*</sup>

<sup>a</sup> Federal Research Center for Problems of Chemical Physics and Medicinal Chemistry of RAS, Semenov Prospect 1, Chernogolovka, 142432, Russia

<sup>b</sup> Institute of Physics and Technology, Ural Federal University, Mira St. 19, 620002 Yekaterinburg, Russia

<sup>c</sup> M. N. Mikheev Institute of Metal Physics, Russian Academy of Sciences, Ural Branch, S. Kovalevskaya St. 18, 620108 Yekaterinburg, Russia

<sup>d</sup> A. N. Nesmeyanov Institute of Organoelement Compounds of Russian Academy of Sciences, Vavilova st. 28, Moscow, 119334, Russia

<sup>e</sup> National Research University Higher School of Economics, Vavilova st. 7, Moscow, 101000, Russia

#### Contents:

**Figure S1.** Photograph of the experimental setup: two UV lamps in metal shielding are placed inside the glove box (a) and emission spectrum of the lamp measured in 200-1150 nm range (b)

**Figure S2.** UV aging dynamics of two independent batches of polymer **P5** and three independent batches of PCDTBT (a). Sample-to-sample reproducibility of the aging behavior of polymer **P14** and similar polymer **P14a** with bulkier solubilizing side chains (b); molecular structures of these polymers (c).

**Figure S3.** The evolution of the UV-vis absorption spectra of **SM1** (a) and **SM2** (b) films upon exposure to UV light inside the glove box. The maximal absorbance vs. aging time plots for **SM1** and **SM2** (c). The evolution of the UV-vis absorption spectra of the insoluble residues obtained after repeatable washing the exposed **SM1** (d) and **SM2** (e) films with CS<sub>2</sub>-acetone-d<sub>6</sub> solvent mixture (preparation of samples for NMR spectroscopy).

**Figure S4.** MALDI TOF mass spectra of **SM2** films exposed to UV light for 30 min (a) and 20 h (b, c); the ranges with  $m/z < 700$  (a, b) and  $m/z > 1000$  (c) are shown to avoid interference with intense **SM2** molecular ion. The assignment of some peaks is shown at the mass spectra, while the structures of the corresponding molecular species are shown in (d).

**Figure S5.** MALDI TOF mass spectra of **SM1** films exposed to UV light for 15 min (a), 30 min (b), and 20 h (c) recorded in the range of  $m/z > 1000$  to avoid interference with intense **SM1** molecular ion. The assignment of some peaks is shown at the mass spectra, while the structures of the corresponding molecular species are shown in (d).

**Figure S6.** MALDI TOF mass spectra of thin films of **P6** (a-b) and **P7** (c) exposed to UV light for 15 min (a and c) or 20 h (b). The assignment of some peaks is shown at the mass spectra, while the structures of the corresponding molecular species are shown in (d).

**Figure S7.** NMR spectra of solutions obtained by dissolving thin films of **SM1** in CS<sub>2</sub>-acetone-d<sub>6</sub> solvent mixture prior (olive line) and after (purple line) UV exposure for 20 h. Full range spectra (a) as well as magnified low-field (b) and high-field (c) parts are shown.

**Figure S8.** NMR spectra of solutions obtained by dissolving thin films of **SM2** in CS<sub>2</sub>-acetone-d<sub>6</sub> solvent mixture after exposure to UV light for 30 min (brown line), 10 h (green line) and 20 h (blue line). Full range spectra (a) as well as magnified low-field (b) and high-field (c) parts are shown.

**Figure S9.** The comparison of the NMR spectra of solutions obtained by dissolving thin films of **SM1** (turquoise) and **SM2** (brown) after exposure to UV light for 20 h and 10 h, respectively. Full range spectra (a) as well as magnified low-field (b) and high-field (c) parts are shown. The reasonable assignments of some signals is also presented with the molecular structures of the identified products drawn on the right side.

**Figure S10.** MALDI TOF mass spectra of samples obtained by dissolving thin films of **SM1** (a) and **SM2** (b) exposed to UV light for 5-20 h in acetone-d<sub>6</sub>/CS<sub>2</sub> mixture for NMR analysis. The molecular structures of the characteristic ions are shown in (c).

**Table S1.** Some electronic and physicochemical properties of polymers **P1-P18** and  $k$  values, reflecting photostability of these materials

***a***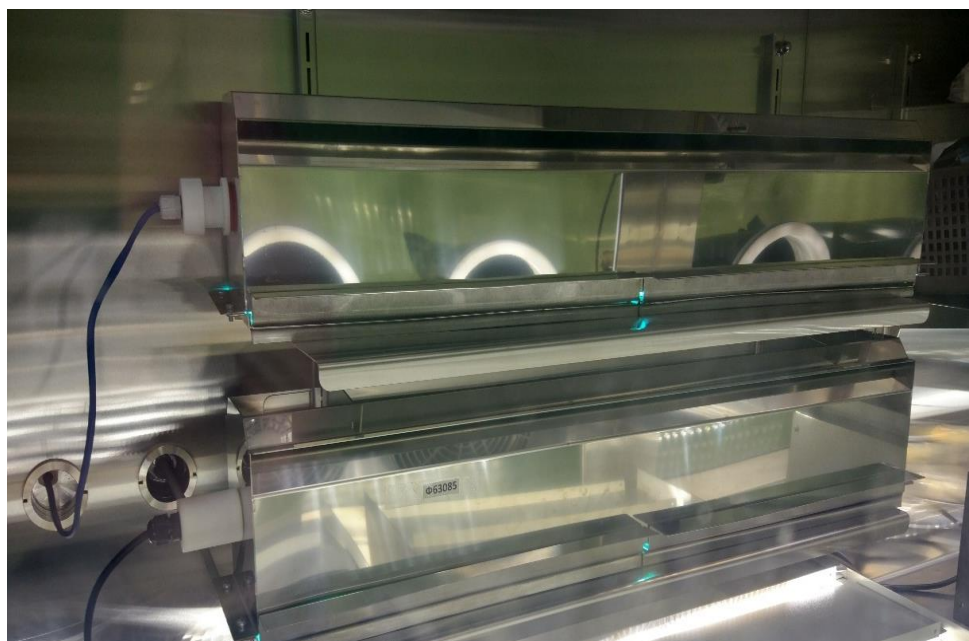***b***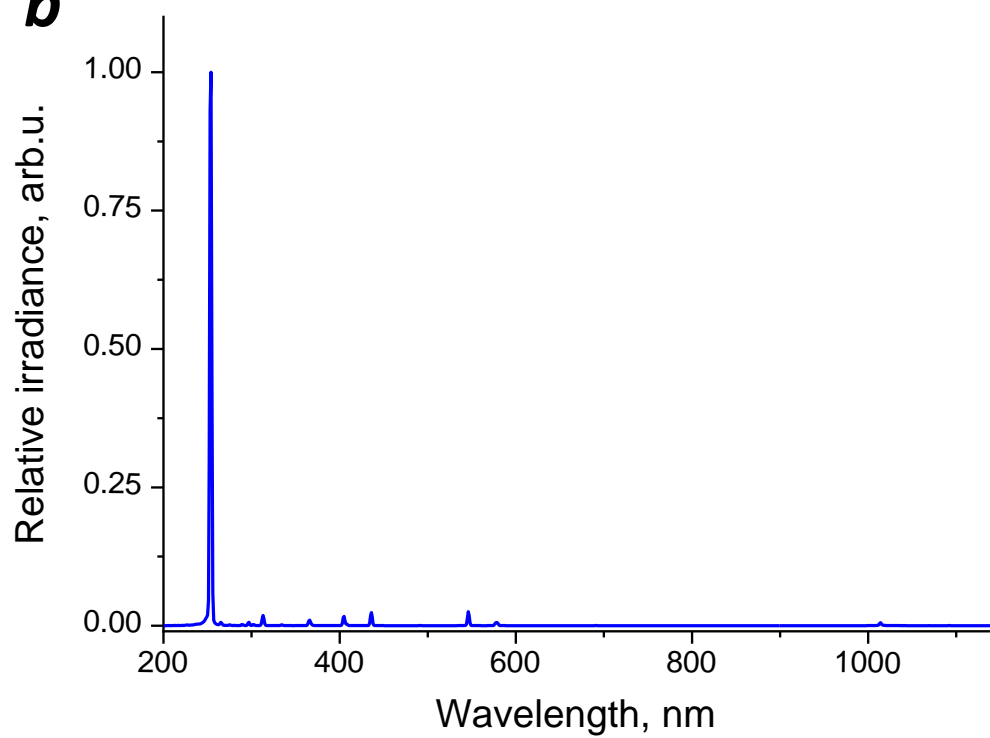

**Figure S1.** Photograph of the experimental setup: two UV lamps in metal shielding are placed inside the glove box (a) and emission spectrum of the lamp measured in 200-1150 nm range (b)

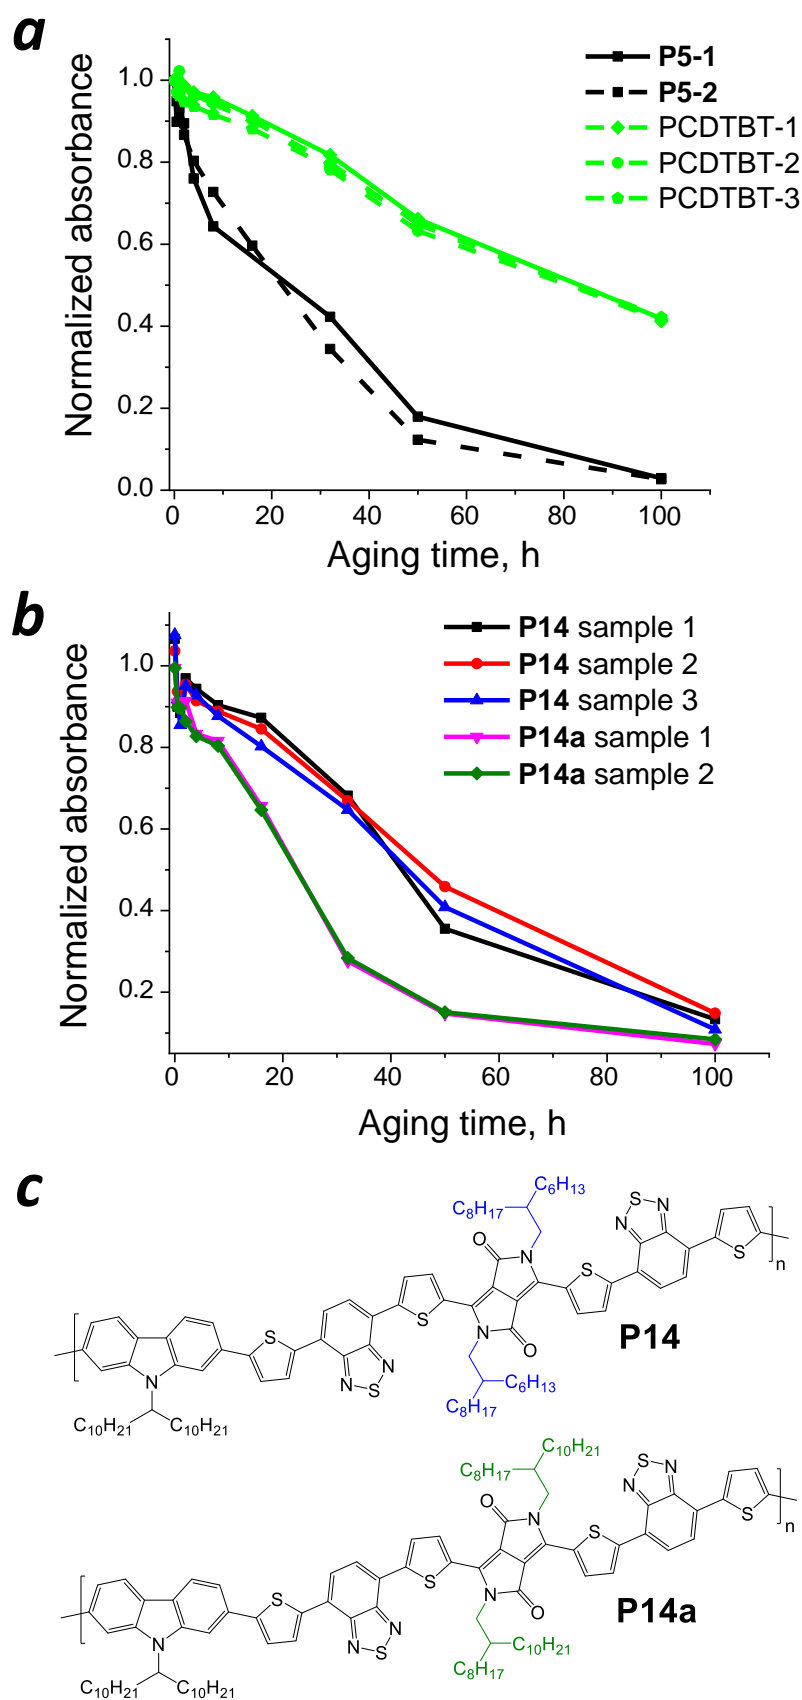

**Figure S2.** UV aging dynamics of two independent batches of polymer **P5** and three independent batches of PCDTBT (a). Sample-to-sample reproducibility of the aging behavior of polymer **P14** and similar polymer **P14a** with bulkier solubilizing side chains (b); molecular structures of these polymers (c).

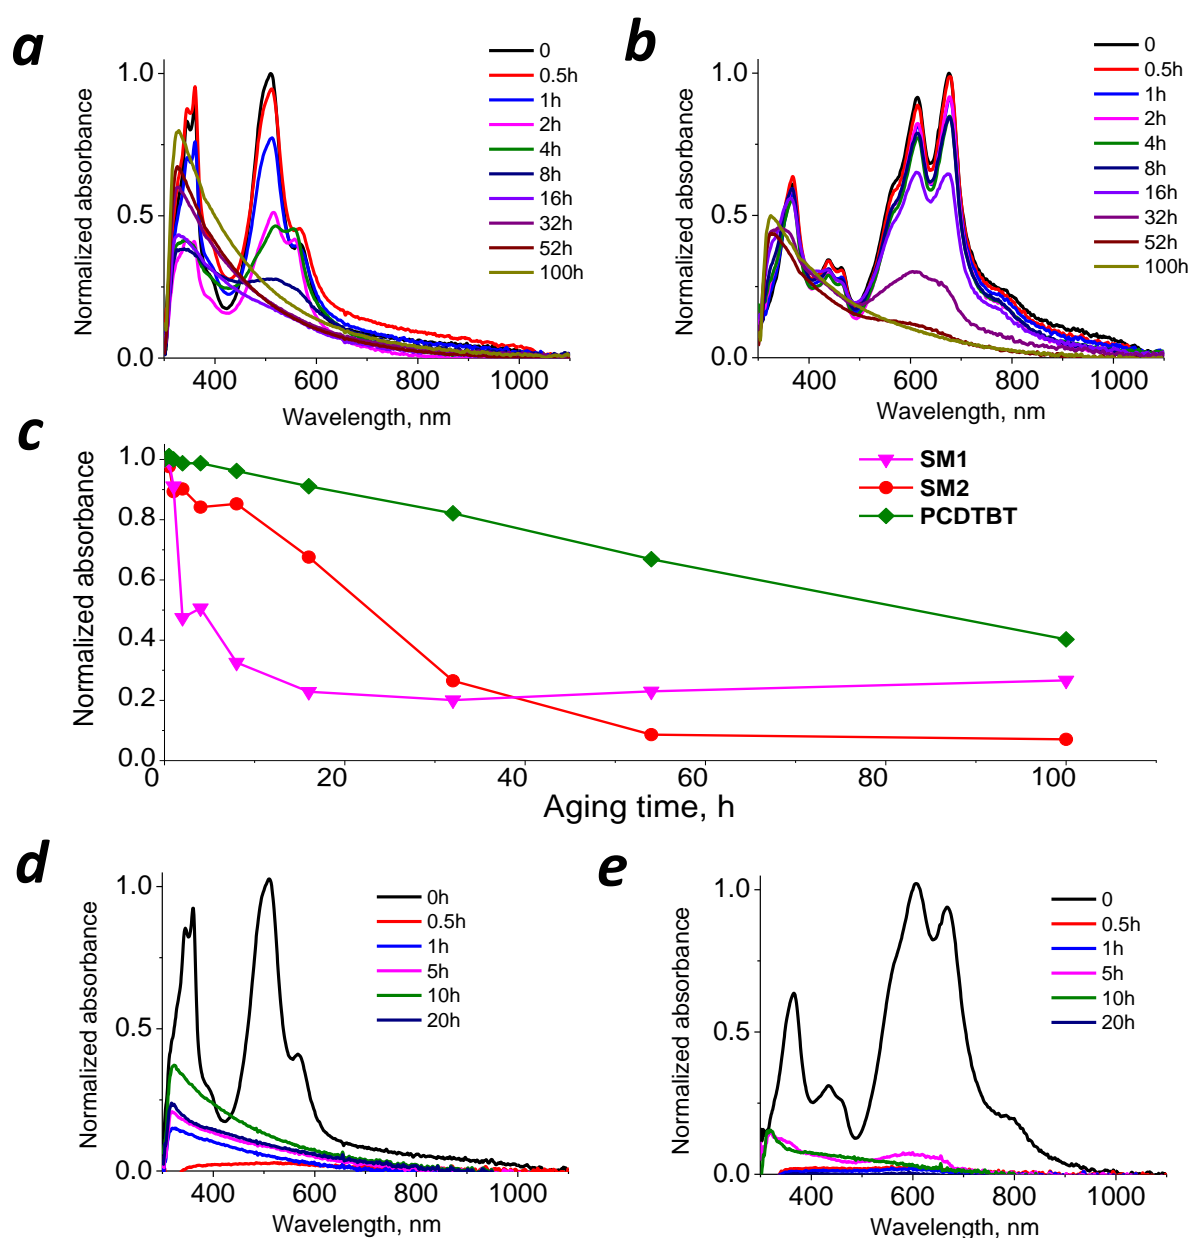

**Figure S3.** The evolution of the UV-vis absorption spectra of **SM1** (a) and **SM2** (b) films upon exposure to UV light inside the glove box. The maximal absorbance vs. aging time plots for **SM1** and **SM2** (c). The evolution of the UV-vis absorption spectra of the insoluble residues obtained after repeatable washing the exposed **SM1** (d) and **SM2** (e) films with  $\text{CS}_2$ -acetone- $\text{d}_6$  solvent mixture (preparation of samples for NMR spectroscopy).

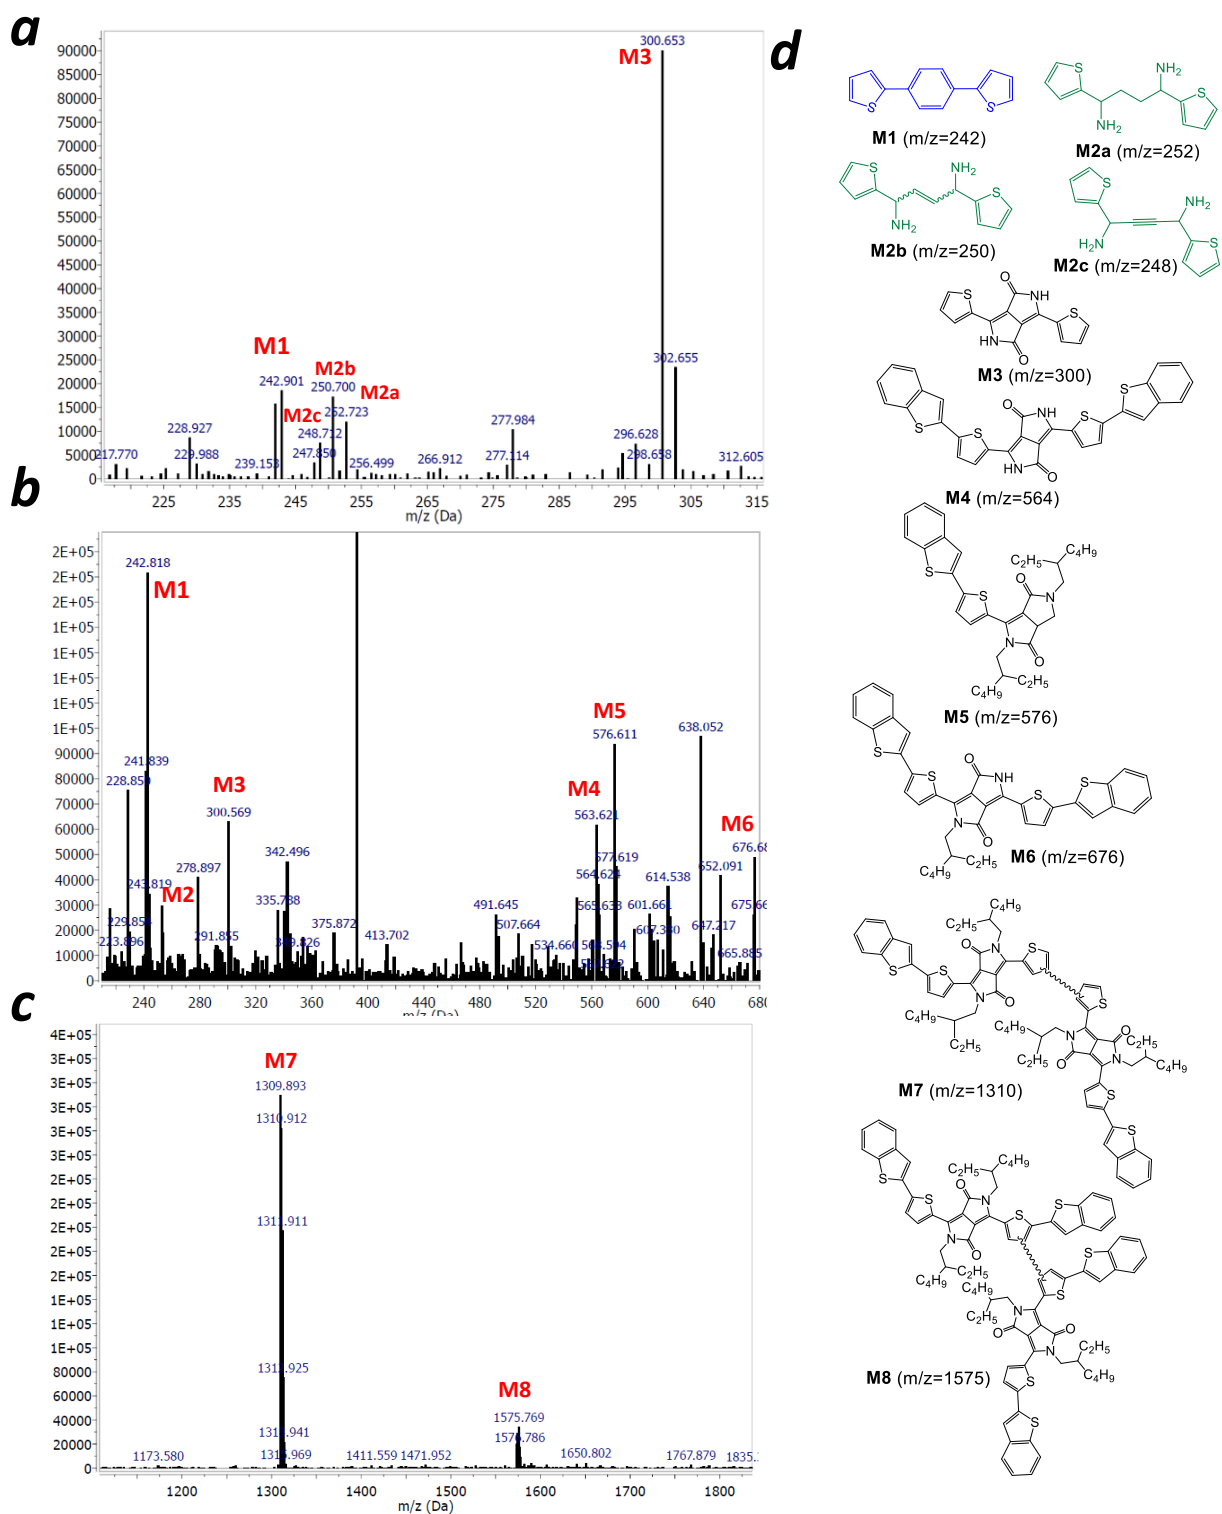

**Figure S4.** MALDI TOF mass spectra of **SM2** films exposed to UV light for 30 min (a) and 20 h (b, c); the ranges with  $m/z < 700$  (a, b) and  $m/z > 1000$  (c) are shown to avoid interference with intense **SM2** molecular ion. The assignment of some peaks is shown at the mass spectra, while the structures of the corresponding molecular species are shown in (d).

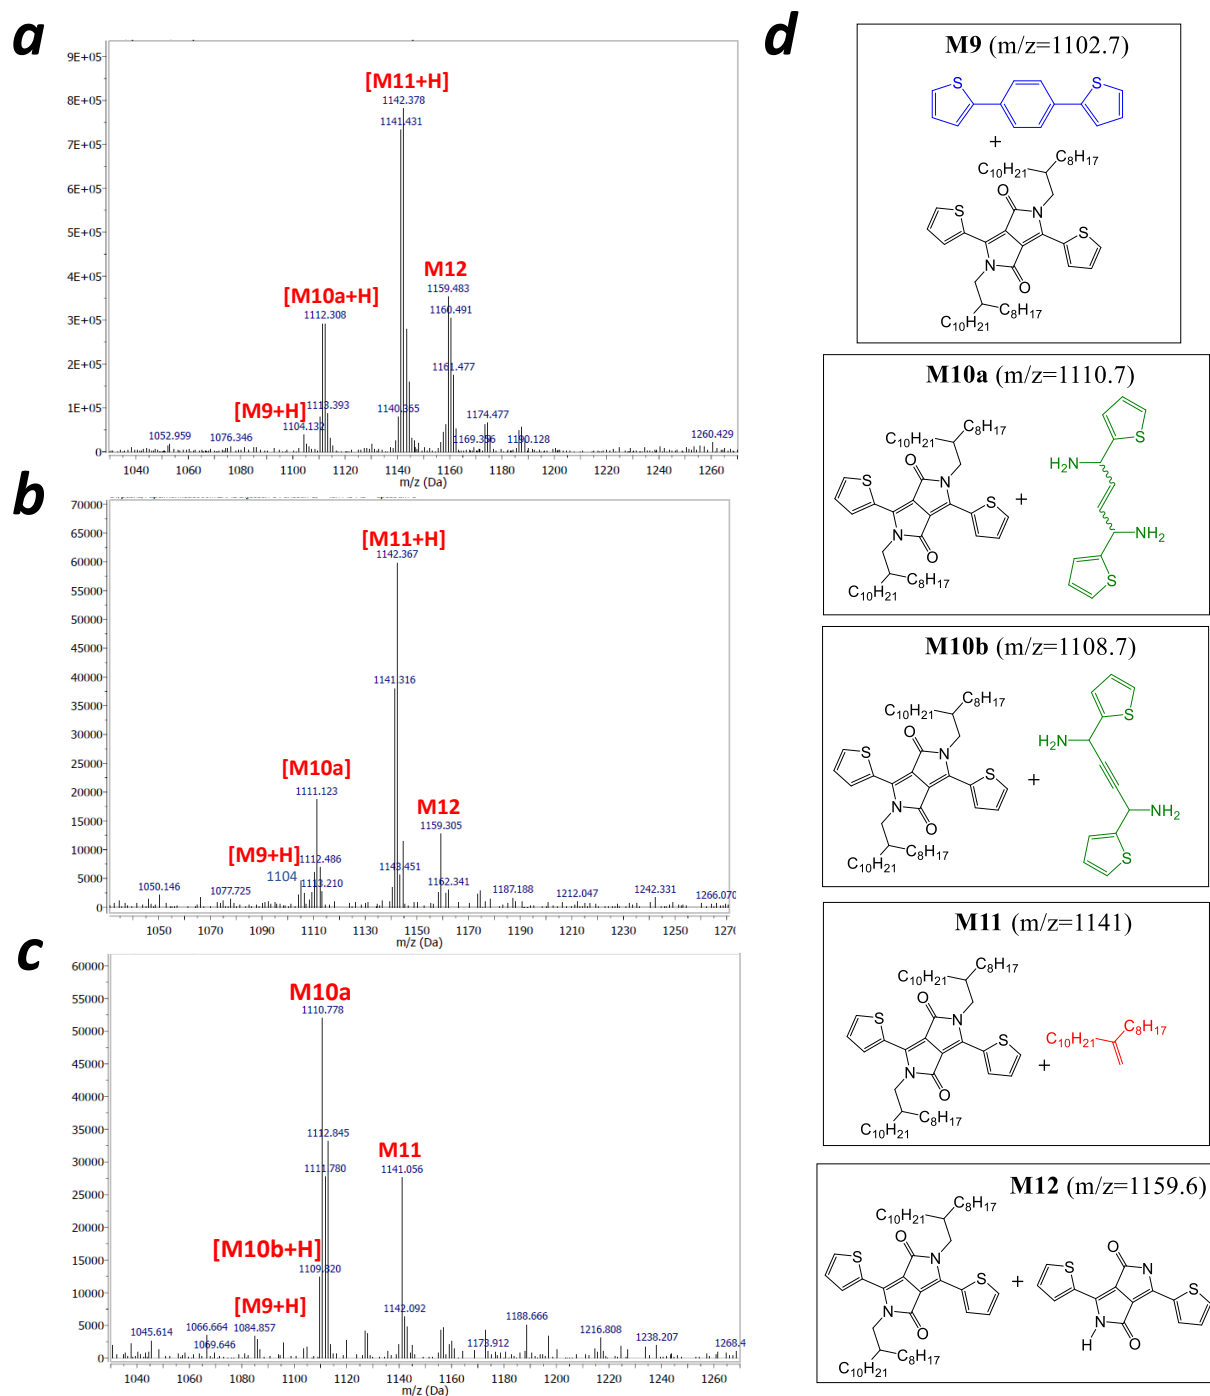

**Figure S5.** MALDI TOF mass spectra of **SM1** films exposed to UV light for 15 min (a), 30 min (b), and 20 h (c) recorded in the range of  $m/z > 1000$  to avoid interference with intense **SM1** molecular ion. The assignment of some peaks is shown at the mass spectra, while the structures of the corresponding molecular species are shown in (d).

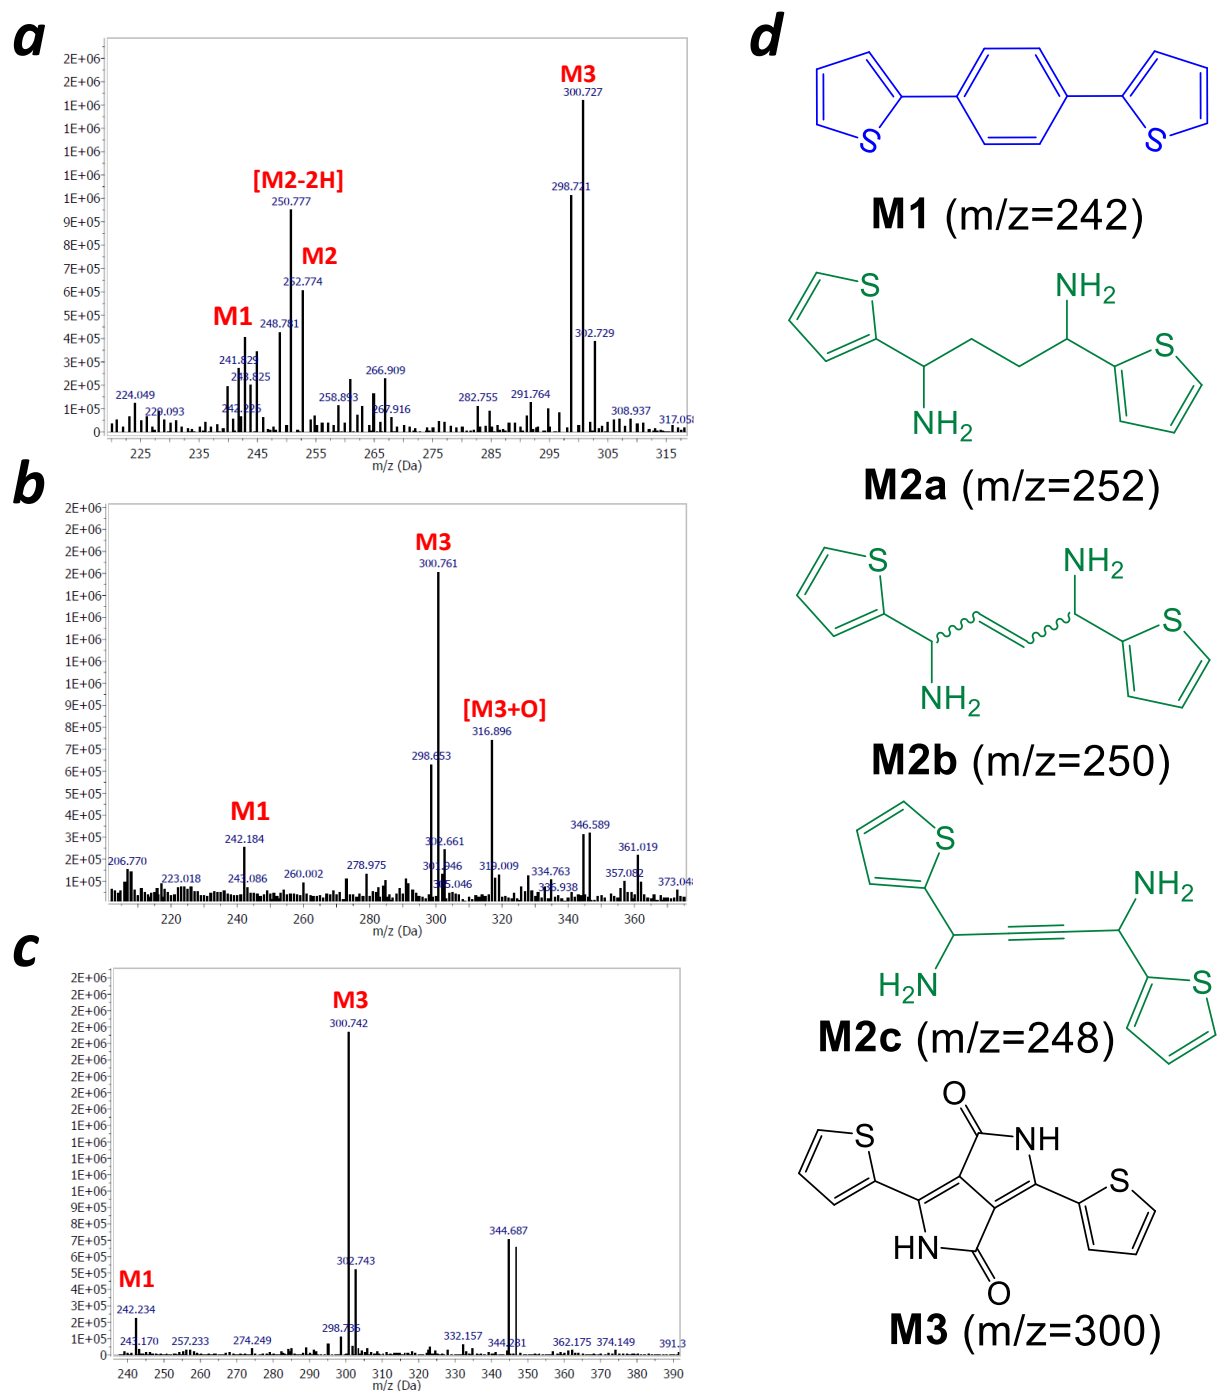

**Figure S6.** MALDI TOF mass spectra of thin films of **P6** (a-b) and **P7** (c) exposed to UV light for 15 min (a and c) or 20 h (b). The assignment of some peaks is shown at the mass spectra, while the structures of the corresponding molecular species are shown in (d).

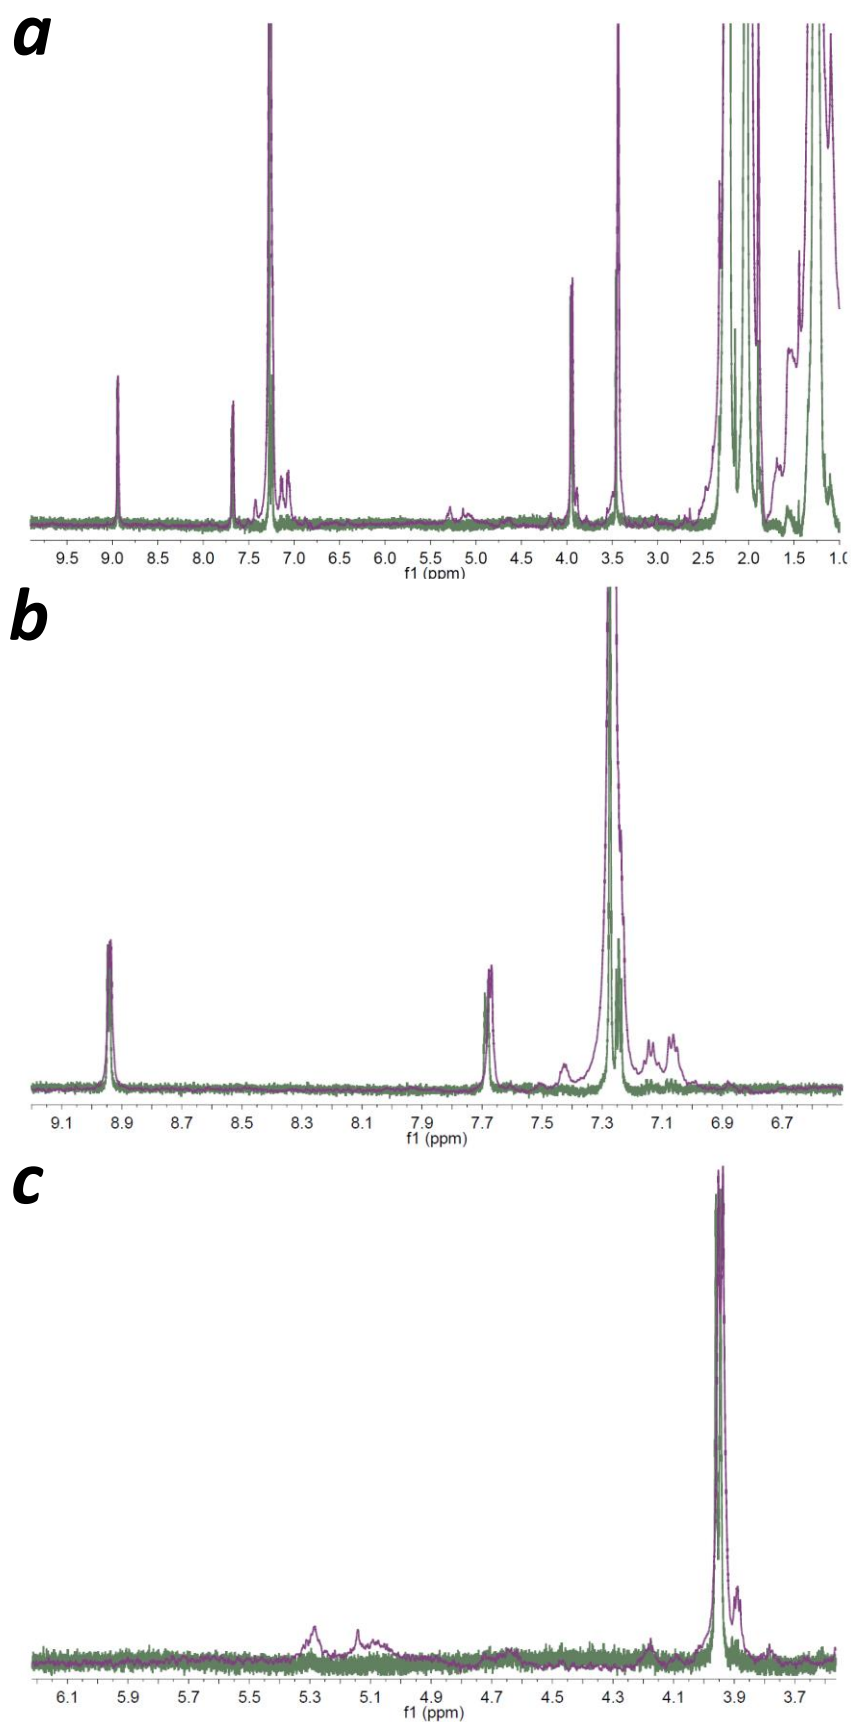

**Figure S7.** NMR spectra of solutions obtained by dissolving thin films of **SM1** in CS<sub>2</sub>-acetone-d<sup>6</sup> solvent mixture prior (olive line) and after (purple line) UV exposure for 20 h. Full range spectra (a) as well as magnified low-field (b) and high-field (c) parts are shown.



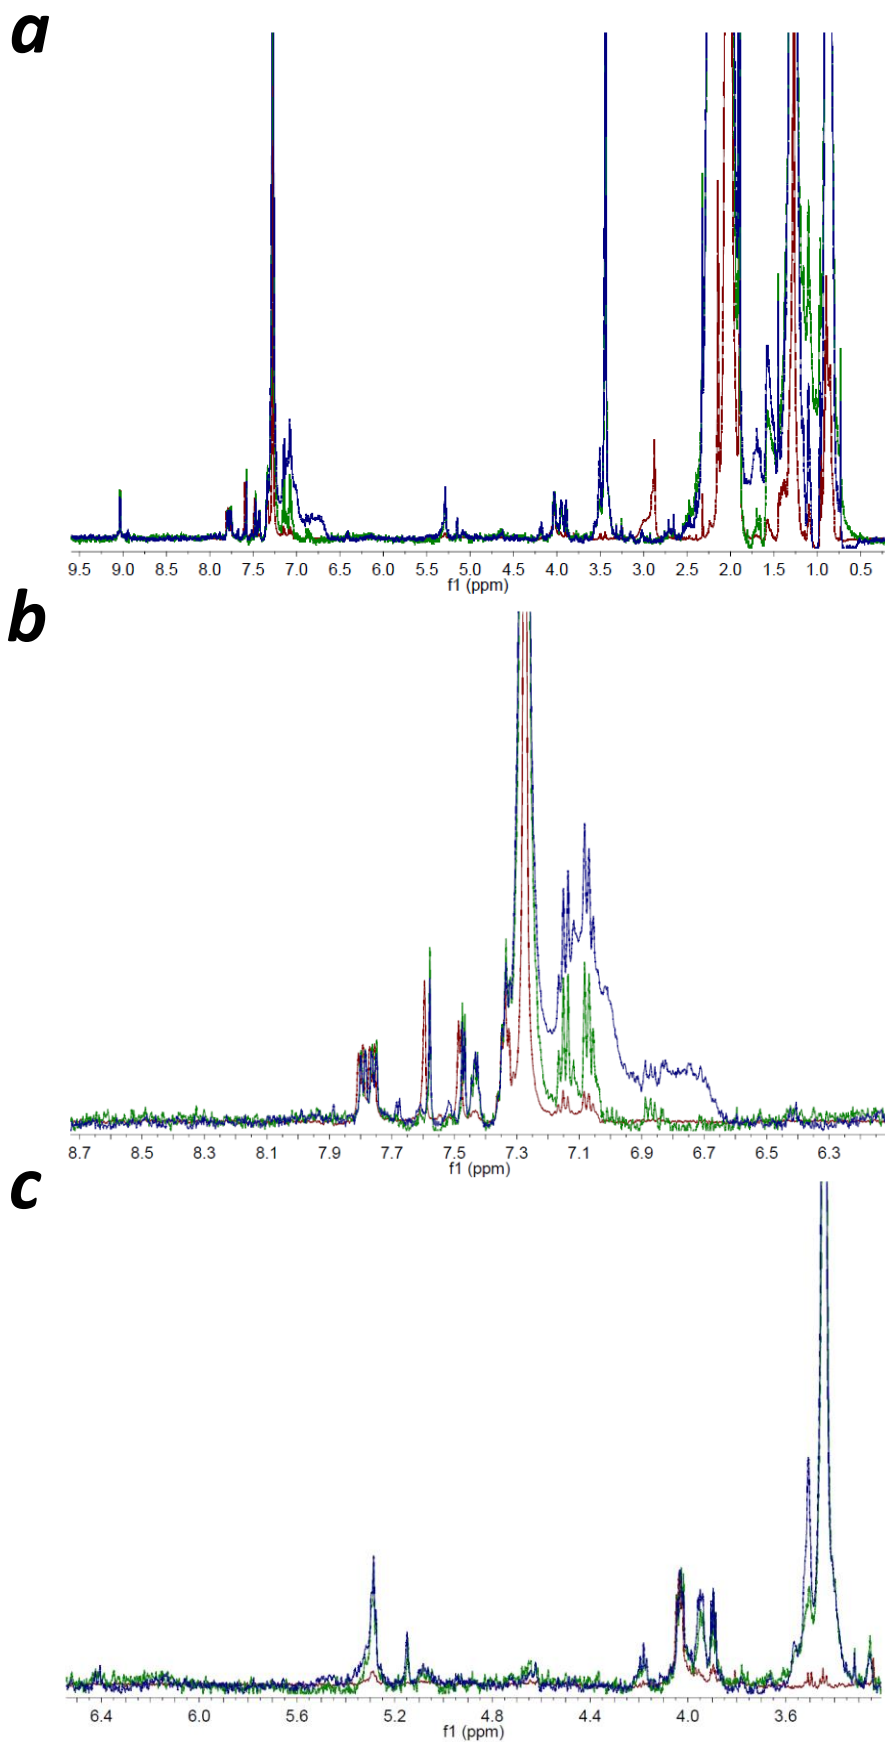

**Figure S8.** NMR spectra of solutions obtained by dissolving thin films of **SM2** in  $\text{CS}_2$ -acetone- $\text{d}^6$  solvent mixture after exposure to UV light for 30 min (brown line), 10 h (green line) and 20 h (blue line). Full range spectra (a) as well as magnified low-field (b) and high-field (c) parts are shown.

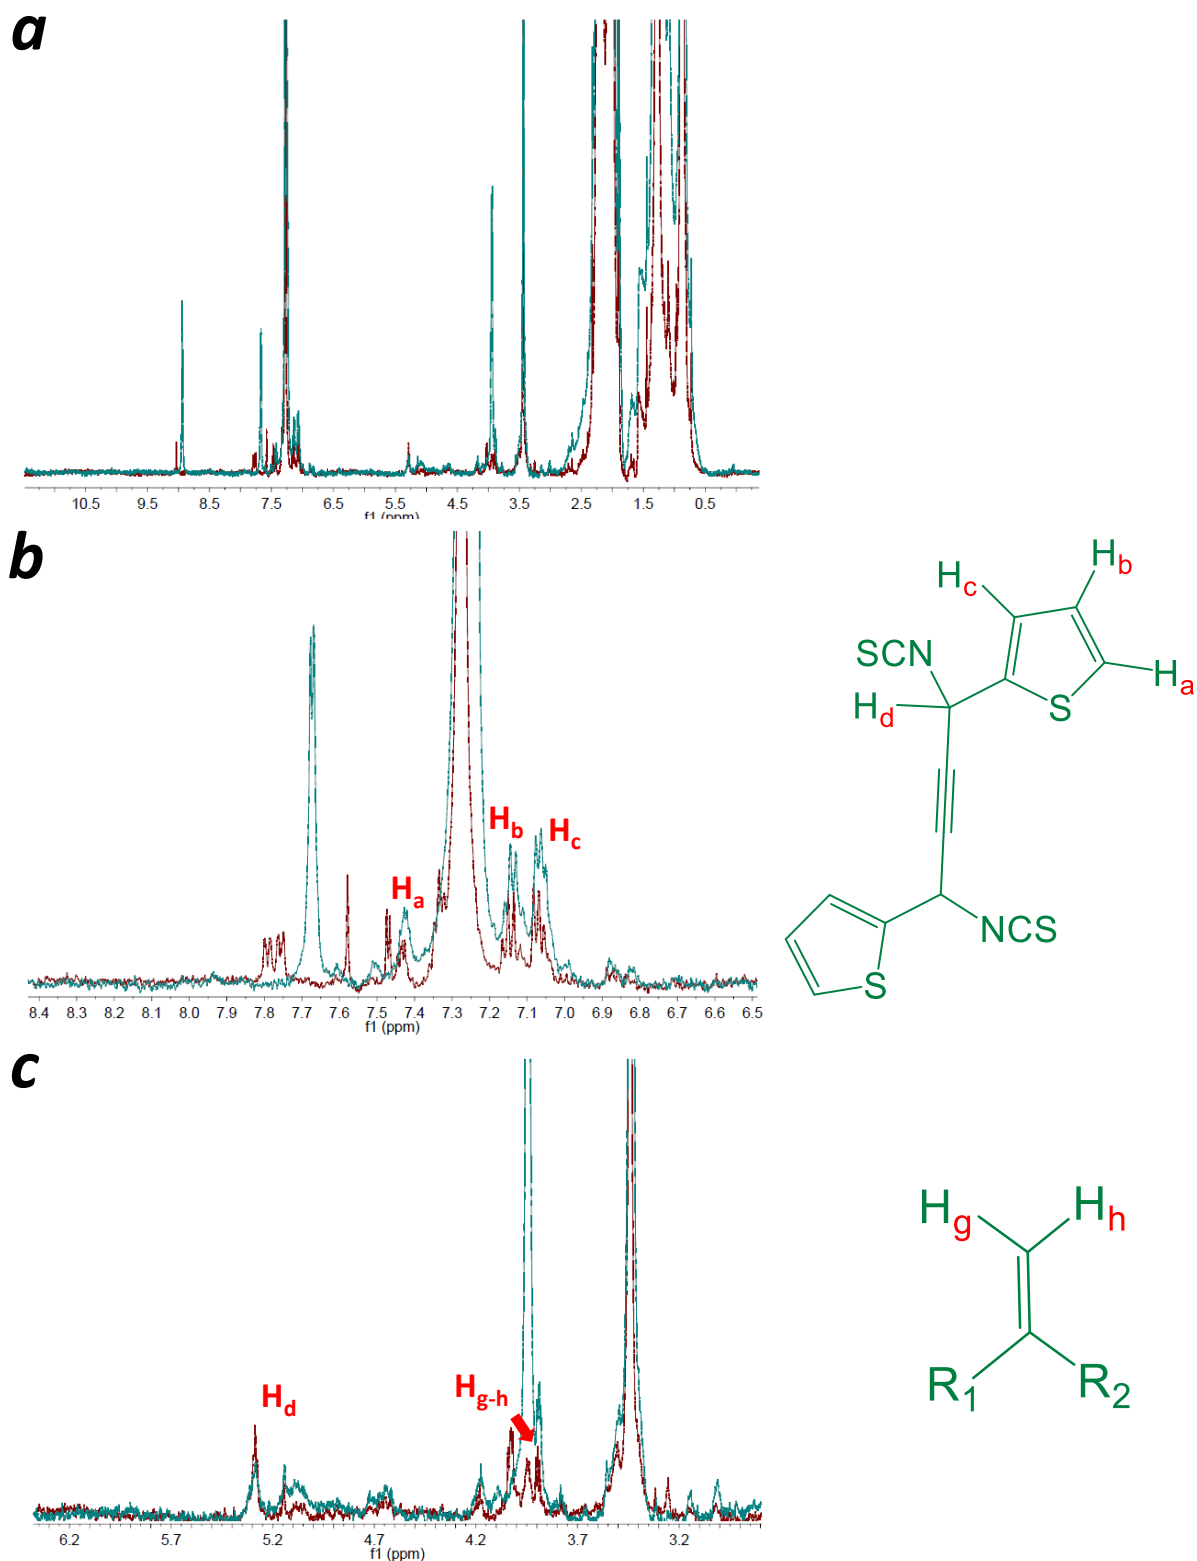

**Figure S9.** The comparison of the NMR spectra of solutions obtained by dissolving thin films of **SM1** (turquoise) and **SM2** (brown) after exposure to UV light for 20 h and 10 h, respectively. Full range spectra (a) as well as magnified low-field (b) and high-field (c) parts are shown. The reasonable assignments of some signals are also presented with the molecular structures of the identified products drawn on the right side.

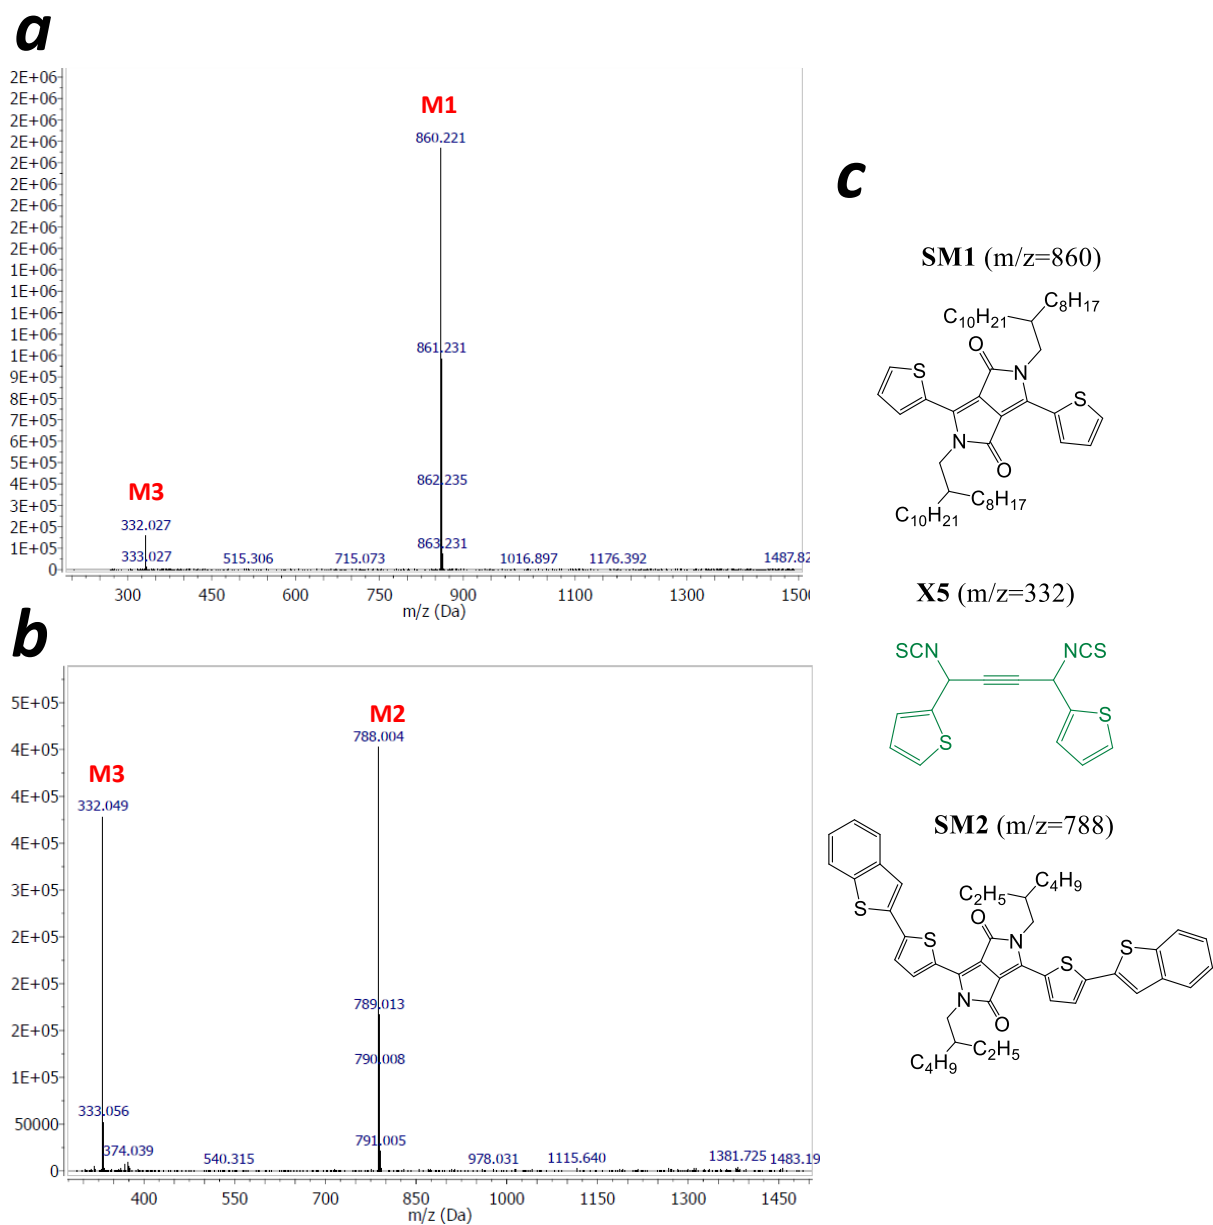

**Figure S10.** MALDI TOF mass spectra of samples obtained by dissolving thin films of **SM1** (a) and **SM2** (b) exposed to UV light for 5-20 h in acetone- $d^6$ /CS<sub>2</sub> mixture for NMR analysis. The molecular structures of the characteristic ions are shown in (c).

**Table S1.** Some electronic and physicochemical properties of polymers **P1-P18** and k values, reflecting photostability of these materials

| <b>Polymer</b> | <b>M<sub>w</sub>, Da</b> | <b>M<sub>w</sub>/M<sub>n</sub></b> | <b><math>\lambda_{max}^{film}, \lambda_{edge}^{film}</math><br/>nm</b> | <b>E<sub>g</sub>,<br/>eV</b> | <b>k=A<sub>20</sub>/A<sub>0</sub></b> |
|----------------|--------------------------|------------------------------------|------------------------------------------------------------------------|------------------------------|---------------------------------------|
| <b>P1</b>      | 154400                   | 2.0                                | 796/1024                                                               | 1.21                         | 0.5                                   |
| <b>P2</b>      | 52400                    | 3.03                               | 744/950                                                                | 1.31                         | 0.7                                   |
| <b>P3</b>      | 133300                   | 2.2                                | 700/855                                                                | 1.45                         | 0.62                                  |
| <b>P4</b>      | 80000                    | 2.0                                | 810/1047                                                               | 1.19                         | 0.5                                   |
| <b>P5</b>      | 157500                   | 2.8                                | 915/1006                                                               | 1.24                         | 0.33                                  |
| <b>P6</b>      | 190000                   | 1.5                                | 951/1120                                                               | 1.11                         | 0.04                                  |
| <b>P7</b>      | 96500                    | 1.52                               | 870/970                                                                | 1.28                         | 0.02                                  |
| <b>P8</b>      | 72500                    | 1.7                                | 883/1003                                                               | 1.24                         | 0.24                                  |
| <b>P9</b>      | 60000                    | 1.7                                | 961/>1150                                                              | <1.08                        | 0.56                                  |
| <b>P10</b>     | 189600                   | 2.2                                | 356/1080                                                               | 1.15                         | 0.34                                  |
| <b>P11</b>     | 142000                   | 1.8                                | 826/936                                                                | 1.33                         | 0.39                                  |
| <b>P12</b>     | 20000                    | 1.3                                | 751/1005                                                               | 1.24                         | 0.38                                  |
| <b>P13</b>     | 14172                    | 2.22                               | 604/714                                                                | 1.74                         | 0.33                                  |
| <b>P14</b>     | 151119                   | 4.2                                | 676/960                                                                | 1.29                         | 0.65                                  |
| <b>P15</b>     | 104000                   | 4.3                                | 740/930                                                                | 1.34                         | 0.43                                  |
| <b>P16</b>     | 41500                    | 1.7                                | 670/836                                                                | 1.49                         | 0.15                                  |
| <b>P17</b>     | 95700                    | 3.7                                | 790/866                                                                | 1.44                         | 0.47                                  |
| <b>P18</b>     | 58000                    | 5.0                                | 695/868                                                                | 1.43                         | 0.31                                  |
